# Supplementary material
Source: MDPI journal article supplement (https://www.mdpi.com/2311-7524/9/11/1198)
Supplement: s1 [file s1]

## Supplementary Files

Table S1 Morphological characteristics of *M. maudiae* 'Rubicunda' flowers at five development stages.

| Stage | flower length<br>(mm) | flower width<br>(mm) | Length of petal<br>(mm) | Width of petal<br>(mm) | RWC of Petal<br>(%) |
|-------|-----------------------|----------------------|-------------------------|------------------------|---------------------|
| S1    | 38.62±3.31d           | 11.75±0.73c          | 39.24±2.57e             | 23.16±1.65c            | 72.8±0.00e          |
| S2    | 46.74±2.73c           | 15.29±0.77c          | 48.77±2.14d             | 25.86±2.36bc           | 75.8±0.01d          |
| S3    | 56.49±3.46b           | 33.7±5.17b           | 61.55±2.09c             | 31.63±1.78a            | 78.8±0.00c          |
| S4    | 71.78±4.18a           | 37.98±2.98b          | 71.90±1.21b             | 28.19±2.63b            | 83.2±0.01b          |
| S5    | 58.72±8.53b           | 45.22±6.72a          | 78.96±0.71a             | 33.85±1.56a            | 84.9±0.00a          |

RWC, relative water content.  $n = 3$ . S1, green bud stage. S2, mature flower bud stage. S3, early blooming stage. S4, fully opened flower stage. S5, senescent flower stage.

**Table S2.** Correlation coefficients of C, N, P and NSCs contents as well as C:N:P ratio variables of *M. maudiae* 'Rubicunda' flowers at five developmental stages

|     | Glu    | Fru    | Suc    | Starch | NSCs   | C     | N      | P      | C:N    | C:P    | N:P    |
|-----|--------|--------|--------|--------|--------|-------|--------|--------|--------|--------|--------|
| S   | 0.01*  | 0.00** | 0.00** | 0.00** | 0.00** | 0.514 | 0.00** | 0.031* | 0.00** | 0.08   | 0.00** |
| O   | 0.00** | 0.00** | 0.01*  | 0.00** | 0.00** | 0.804 | 0.00** | 0.00** | 0.00** | 0.00** | 0.00** |
| S*O | 0.01*  | 0.00** | 0.00** | 0.00** | 0.00** | 0.626 | 0.00** | 0.00** | 0.797  | 0.048* | 0.752  |

Data are Pearson correlation coefficients. \*\*indicates an extremely significant correlation at the 0.01 level, \*indicates a significant correlation at the 0.05 level. S: Stage, O: Organ, C: Carbon, N: nitrogen, P: phosphorus. Glu, glucose. Fru, fructose. Suc, sucrose. NSCs, non-structural carbohydrates.  $n = 3$ .
